# Supplementary material for: Clinical governance implementation in a selected teaching emergency department: a systems approach
Source: Implement Sci. 2012 Sep 10;7:84. doi: 10.1186/1748-5908-7-84 (PMC3457909; doi:10.1186/1748-5908-7-84)
Supplement: Additional file 1 — Time table. The predicted timetable for the research process. [file 1748-5908-7-84-S1.pdf]

**Additional file 1: Time table.** The predicted time table for the research process

| <b>Year/Month</b>                                                | <b>2012</b> |          |          |          |          |          |          |          |           |           |           | <b>2013</b> |
|------------------------------------------------------------------|-------------|----------|----------|----------|----------|----------|----------|----------|-----------|-----------|-----------|-------------|
| <b>Activity</b>                                                  | <b>2</b>    | <b>3</b> | <b>4</b> | <b>5</b> | <b>6</b> | <b>7</b> | <b>8</b> | <b>9</b> | <b>10</b> | <b>11</b> | <b>12</b> | <b>1</b>    |
| Selecting an emergency department<br>for conducting the research | •           |          |          |          |          |          |          |          |           |           |           |             |
| Perceiving the situation regarding<br>quality of care            |             | •        | •        | •        | •        | •        |          |          |           |           |           |             |
| Providing relevant “purposeful<br>activity models”               |             |          |          |          |          | •        | •        |          |           |           |           |             |
| Seeking accommodations among<br>stakeholders                     |             |          |          |          |          |          | •        | •        | •         | •         | •         |             |
| Defining changes to improve the<br>quality of care               |             |          |          |          |          |          |          |          | •         | •         | •         |             |
| Writing final report                                             |             |          |          |          |          |          |          |          |           |           | •         | •           |
